# Supplementary material for: Realizing Both Antibacterial Activity and Cytocompatibility in Silicocarnotite Bioceramic via Germanium Incorporation
Source: MDPI journal article supplement (doi:10.3390/jfb14030154), 2023-03-14
Supplement: s1 [file s1]

Article

# Supplementary Materials: Realizing Both Antibacterial Activity and Cytocompatibility in Silicocarnotite Bioceramic via Germanium Incorporation

Yingqi Ji <sup>1,2</sup>, Shun Yang <sup>1,2</sup>, Jian Sun <sup>3,\*</sup> and Congqin Ning <sup>4,\*</sup>

<sup>1</sup> State Key Laboratory of High Performance Ceramics and Superfine Microstructure, Shanghai Institute of Ceramics, Chinese Academy of Sciences, Shanghai 200050, China

<sup>2</sup> Center of Materials Science and Optoelectronics Engineering, University of Chinese Academy of Sciences, Beijing 100049, China

<sup>3</sup> Department of Prosthodontics, Shanghai Ninth People's Hospital, Shanghai Jiao Tong University School of Medicine, Shanghai 200011, China

<sup>4</sup> The Education Ministry Key Lab of Resource Chemistry, Shanghai Key Laboratory of Rare Earth Functional Materials and Shanghai Frontiers Science Center of Biomimetic Catalysis, Shanghai Normal University, Shanghai 200234, China

\* Correspondence: doctorsunjian74@163.com (J.S.); cqning@shnu.edu.cn (C.N.)

## Inhibition diameter assessment

In brief, 100  $\mu$ L bacteria suspension ( $10^7$  cfu/mL) including *S. aureus* or *E. coli* was seeded on TSB or LB agar medium respectively, and the sample was put on its surface and then cultured for 18 h at 37  $^{\circ}$ C in an incubator under the atmosphere. The antibacterial ability was investigated by the area of inhibition rings around the specimens (the bigger the area, the better the antibacterial property).

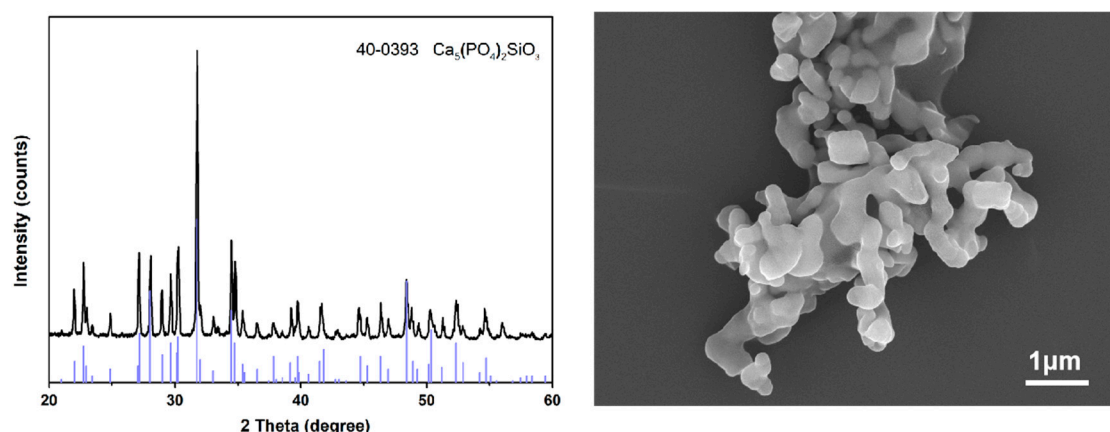

**Figure S1.** XRD patterns and SEM morphologies of the CPS powders.

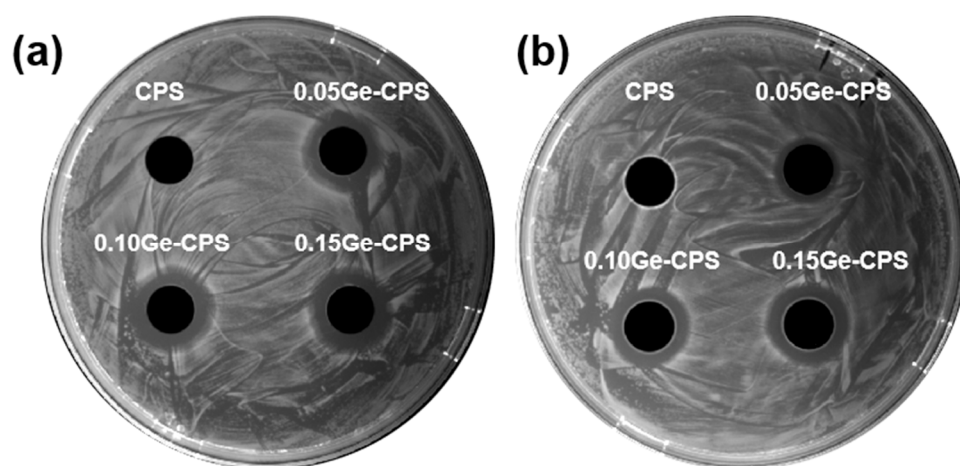

**Figure S2.** Inhibition rings around CPS, 0.05Ge-CPS, 0.10Ge-CPS and 0.15Ge-CPS samples against (a) *E. coli* and (b) *S. aureus*.
